# Supplementary material for: A NiN3-embedded MoS2monolayer as a promising electrocatalyst with high activity for the oxygen evolution reaction: a computational study
Source: Royal Society of Chemistry journal article supplement (doi:10.1039/d1se00423a), 2021-01-01
Supplement: d1se00423a1.pdf [file d1se00423a1.pdf]

## Electronic supporting information

### **NiN<sub>3</sub>-Embedded MoS<sub>2</sub> Monolayer as a Promising Electrocatalyst with High Activity for Oxygen Evolution Reaction: A Computational Study**

*Xinyi Li,<sup>a</sup> Dongxu Jiao,<sup>a</sup> Yanyu Liang,<sup>b,\*</sup> Jingxiang Zhao<sup>a,\*</sup>*

*<sup>a</sup> College of Chemistry and Chemical Engineering, and Key Laboratory of Photonic and Electronic Bandgap Materials, Ministry of Education, Harbin Normal University, Harbin, 150025, P. R. China*

*<sup>b</sup> Jiangsu key Laboratory of Electrochemical Energy Storage Technologies, College of Material Science and Technology Nanjing University of Aeronautics and Astronautics Nanjing 210016, P. R. China*

*\* To whom correspondence should be addressed. Email: liangyy403@126.com (YL)*

*and xjz\_hmily@163.com or zhaojingxiang@hrbnu.edu.cn (JZ)*

## Computational Details on Dissolution Potential and Overpotential

To evaluate the stability of NiN<sub>3</sub>@MoS<sub>2</sub> monolayer in realistic reaction conditions, such as strong acidic media and working potential, we computed the dissolution potentials ( $U_{dis}$ , in V) of Ni in N<sub>3</sub>@MoS<sub>2</sub> monolayer at pH=0, which was defined as:  $U_{dis} = U_{Ni}^0 + [E_{Ni,bulk} - (E_{NiN_3@MoS_2} - E_{N_3@MoS_2})]/ne$ , where  $U_{Ni}^0$  is the standard dissolution potential of Ni in the bulk form (-0.26 V), N<sub>3</sub>@MoS<sub>2</sub> is the doped MoS<sub>2</sub> monolayer by substituting three S atoms with three N dopants, and  $n$  is the coefficient for the aqueous dissolution reaction: Ni + 2H<sup>+</sup> ↔ Ni<sup>2+</sup> + H<sub>2</sub>, namely,  $n$  equals to 2. According to this definition, the  $U_{dis}$  value of Ni in NiN<sub>3</sub>@MoS<sub>2</sub> monolayer is computed to be about 0.30 V.

On the other hand, the overpotential ( $\eta$ ) value of OER was obtained according to the following equation:  $\eta = U_L - U_0$ , where  $U_0$  is the computed equilibrium potential of OER ( $U_0 = 1.23$  V), and  $U_L$  is the limiting potential of OER on NiN<sub>3</sub>@MoS<sub>2</sub> monolayer ( $U_L = \Delta G_{max}/e$ , V). Since the  $\Delta G_{max}$  value for OER on NiN<sub>3</sub>@MoS<sub>2</sub> monolayer was computed to be 1.68 eV, the computed  $U_L$  is [(1.68 eV)/ $e$  - 1.23 V] = 0.45 V]. Thus, the negative overpotential ( $-\eta$ ) of OER on NiN<sub>3</sub>@MoS<sub>2</sub> monolayer is -0.45 V, which is much smaller than the  $U_{dis}$  value of Ni (0.30 V), suggesting that Ni within the NiN<sub>3</sub>@MoS<sub>2</sub> framework can survive under the realistic experimental conditions of OER, and thus ensuring their excellent long-term stability.

**Table S1.** The computed binding energies ( $E_{\text{bind}}$ , eV), shortest distances between TM and N atoms ( $d_{\text{TM-N}}$ , Å), charge transfer ( $Q$ , |e|) from TM to substrate, height ( $h$ , Å) of TM outward from MoS<sub>2</sub> monolayer, and overpotential ( $\eta$ , V) for various TMN<sub>*x*</sub> (*x* = 1-3) moieties embedded into MoS<sub>2</sub> monolayer.

|                  | $E_{\text{bind}}$ | $d_{\text{TM-N}}$ | $Q$  | $h$  | $\eta$ |
|------------------|-------------------|-------------------|------|------|--------|
| MnN <sub>3</sub> | -5.68             | 1.91              | 1.18 | 0.42 | 1.59   |
| FeN <sub>3</sub> | -6.17             | 1.92              | 1.17 | 0.42 | 0.87   |
| CoN <sub>3</sub> | -5.63             | 1.89              | 0.98 | 0.35 | 0.63   |
| NiN <sub>3</sub> | -5.35             | 1.92              | 0.81 | 0.31 | 0.45   |
| CuN <sub>3</sub> | -3.38             | 1.98              | 0.78 | 0.45 | 0.85   |
| RhN <sub>3</sub> | -5.29             | 2.00              | 0.38 | 0.40 | 1.12   |
| PdN <sub>3</sub> | -3.14             | 2.17              | 0.58 | 0.75 | 0.65   |
| PtN <sub>3</sub> | -4.19             | 2.05              | 0.61 | 0.89 | 1.40   |
| MnN <sub>2</sub> | -4.87             | 1.95              | 1.10 | 0.97 | 1.50   |
| FeN <sub>2</sub> | -4.06             | 1.85              | 0.96 | 0.75 | 1.45   |
| CoN <sub>2</sub> | -4.99             | 1.89              | 0.77 | 0.81 | 1.26   |
| NiN <sub>2</sub> | -4.93             | 1.86              | 0.64 | 0.73 | 0.59   |
| CuN <sub>2</sub> | -3.31             | 1.94              | 0.71 | 0.90 | 0.89   |
| RhN <sub>2</sub> | -5.13             | 2.04              | 0.53 | 1.45 | 0.94   |
| PdN <sub>2</sub> | -3.07             | 2.15              | 0.42 | 1.45 | 0.67   |
| PtN <sub>2</sub> | -4.13             | 2.11              | 0.35 | 1.46 | 0.91   |
| MnN <sub>1</sub> | -3.27             | 1.90              | 0.99 | 0.95 | 1.28   |
| FeN <sub>1</sub> | -3.97             | 1.85              | 0.82 | 0.78 | 0.99   |
| CoN <sub>1</sub> | -4.19             | 1.82              | 0.68 | 0.79 | 0.98   |
| NiN <sub>1</sub> | -4.57             | 1.81              | 0.57 | 0.72 | 0.72   |
| CuN <sub>1</sub> | -3.13             | 1.89              | 0.61 | 1.06 | 0.82   |
| RhN <sub>1</sub> | -4.56             | 1.90              | 0.41 | 1.05 | 0.89   |
| PdN <sub>1</sub> | -2.92             | 2.02              | 0.39 | 1.41 | 0.84   |
| PtN <sub>1</sub> | -3.85             | 1.93              | 0.26 | 1.60 | 1.14   |

**Table S2.** The comparison of overpotential for various reported metal-doped MoS<sub>2</sub> materials.

| catalysts                                       | overpotential       |
|-------------------------------------------------|---------------------|
| Co-doped MoS <sub>2</sub>                       | 0.22 V <sup>1</sup> |
| Pd <sub>2</sub> @MoS <sub>2</sub>               | 0.32 V <sup>2</sup> |
| NiN <sub>3</sub> @MoS <sub>2</sub> in this work | 0.45 V              |
| Pt@T1-vacancy                                   | 0.46 V <sup>3</sup> |
| Co-Ni-P@MoS <sub>2</sub>                        | 0.68 V <sup>4</sup> |
| Ni-doped MoS <sub>2</sub>                       | 1.08 V <sup>5</sup> |
| Fe-doped MoS <sub>2</sub>                       | 1.57 V <sup>6</sup> |

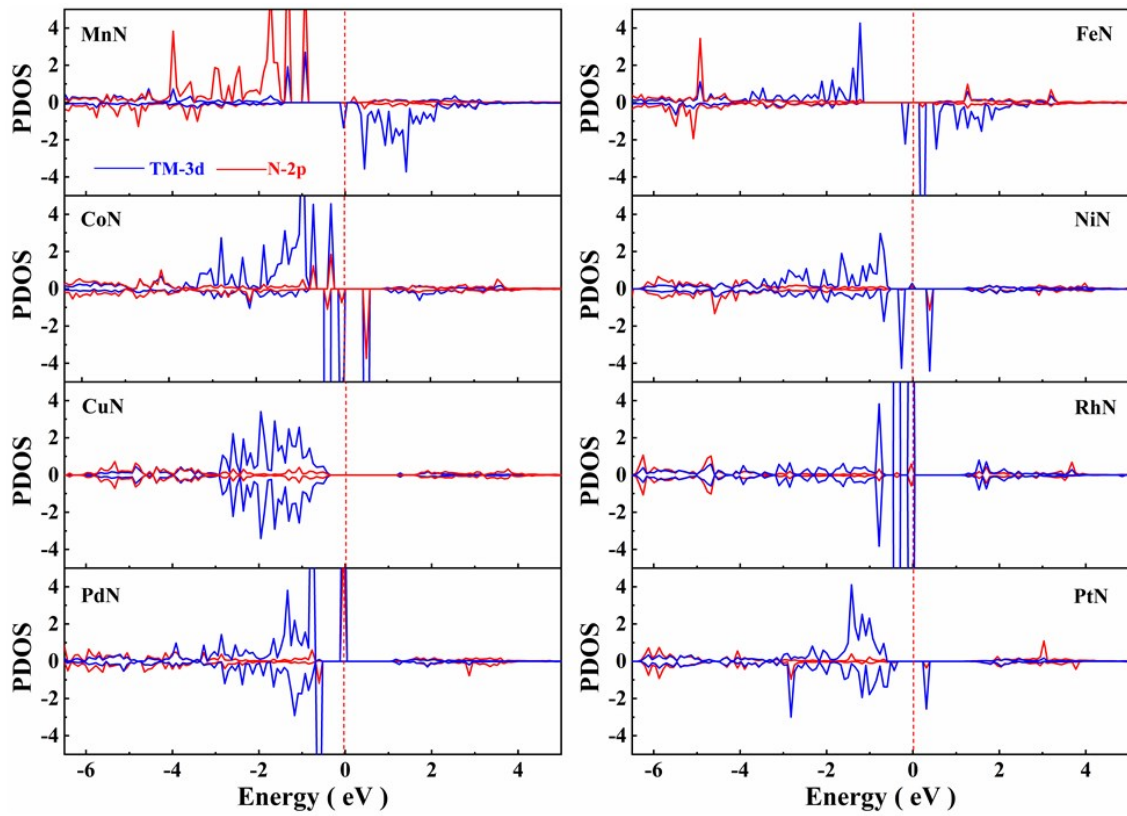

(a)

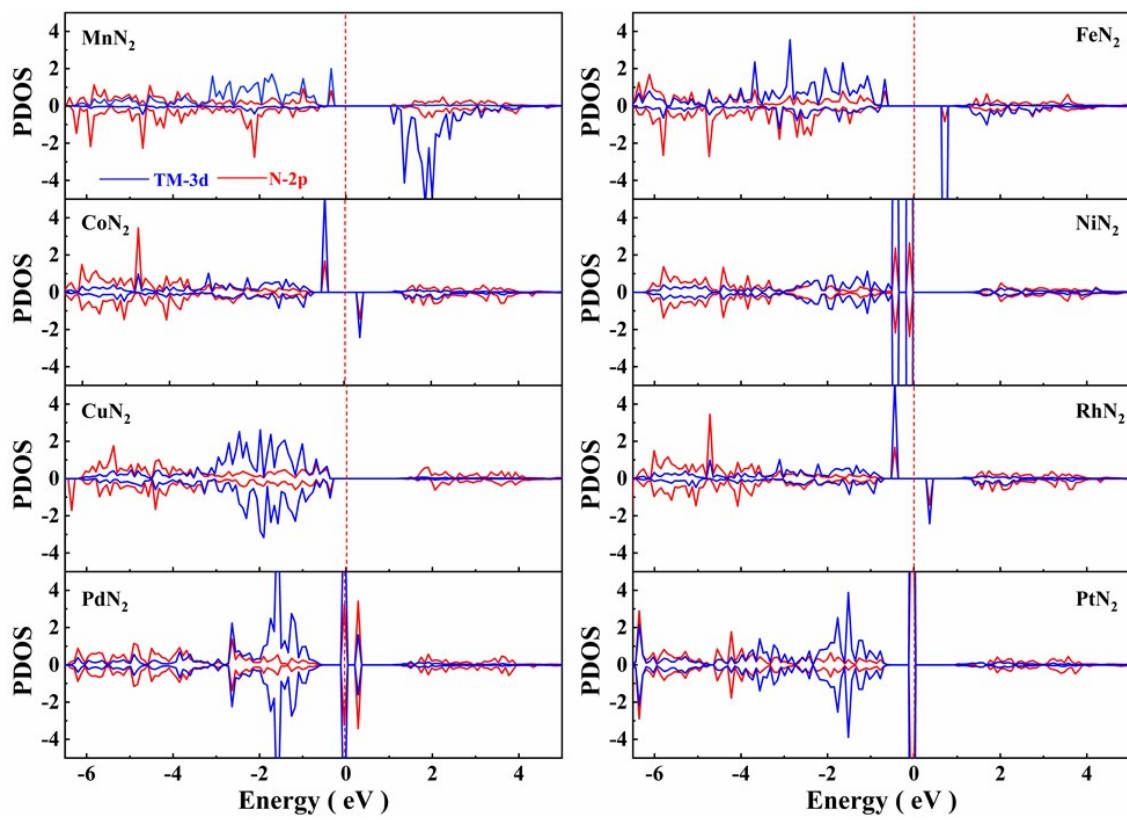

(b)

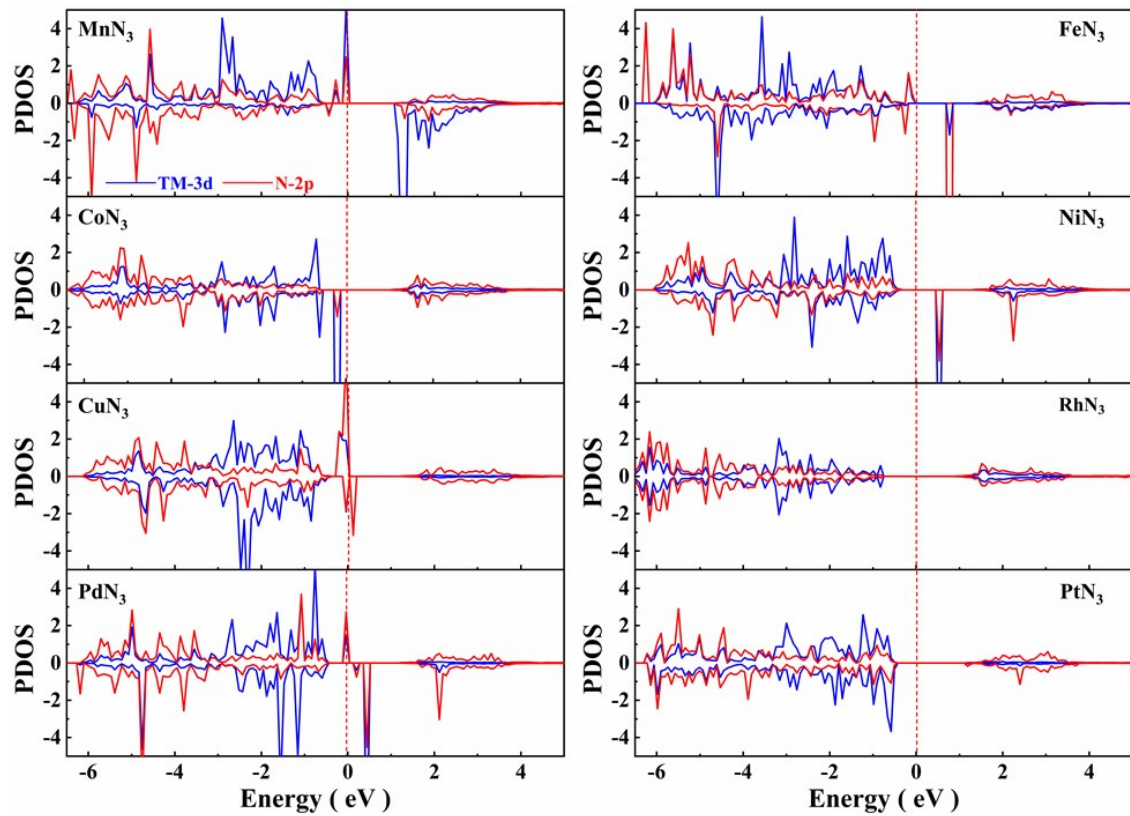

(c)

**Fig. S1.** The computed projected density of states (PDOSs) of (a) TMN<sub>1</sub>, (b) TMN<sub>2</sub>, and (c) TMN<sub>3</sub> moieties embedded into MoS<sub>2</sub> monolayer. The Fermi level was set to zero in red dotted line.

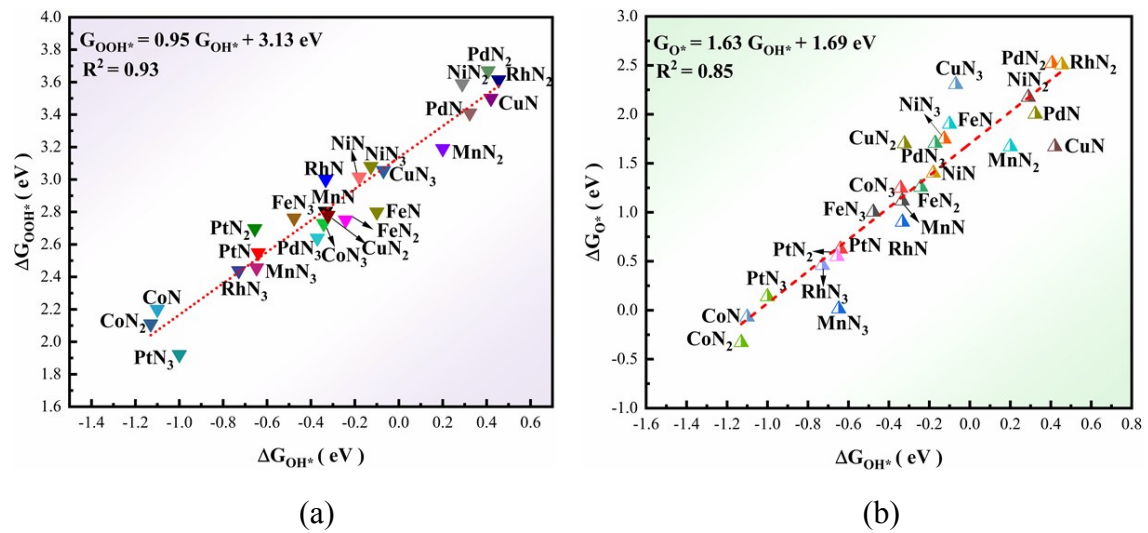

**Fig. S2.** The scaling relationships for Gibbs adsorption free energy of (a) OOH\* vs OH\* and (b) O\* vs OH\* species on TMN<sub>x</sub>@MoS<sub>2</sub> (x = 1-3) materials.

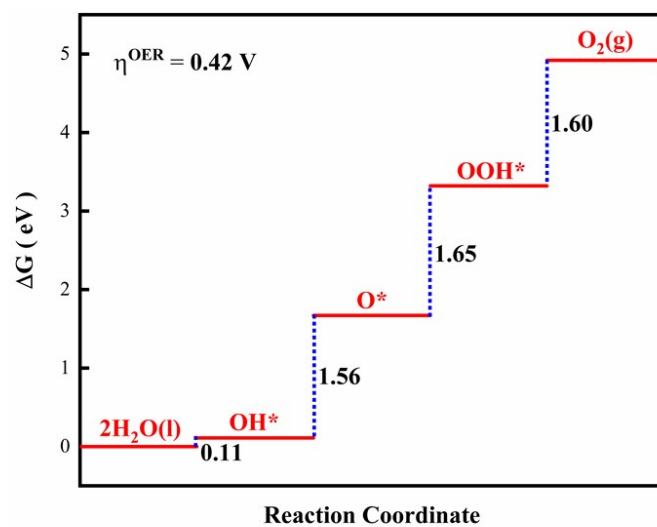

**Fig. S3.** The computed free energy profile for OER on  $\text{NiN}_3@\text{MoS}_2$  catalyst with solvent effect.



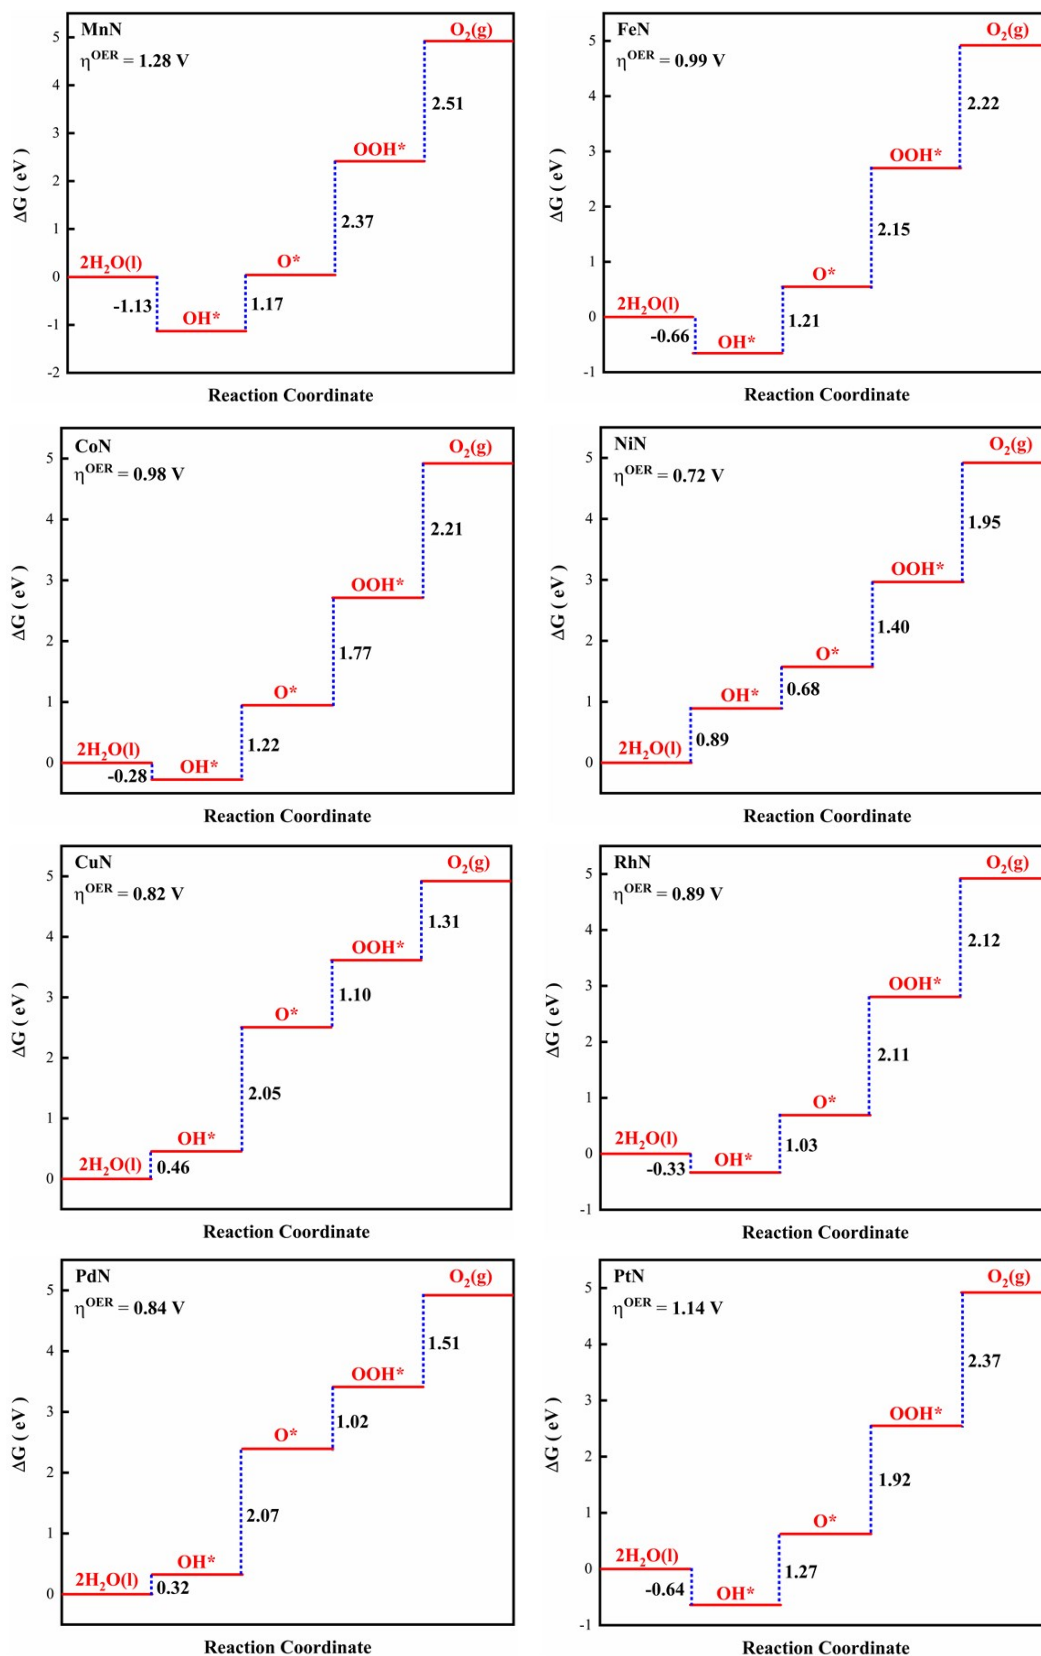

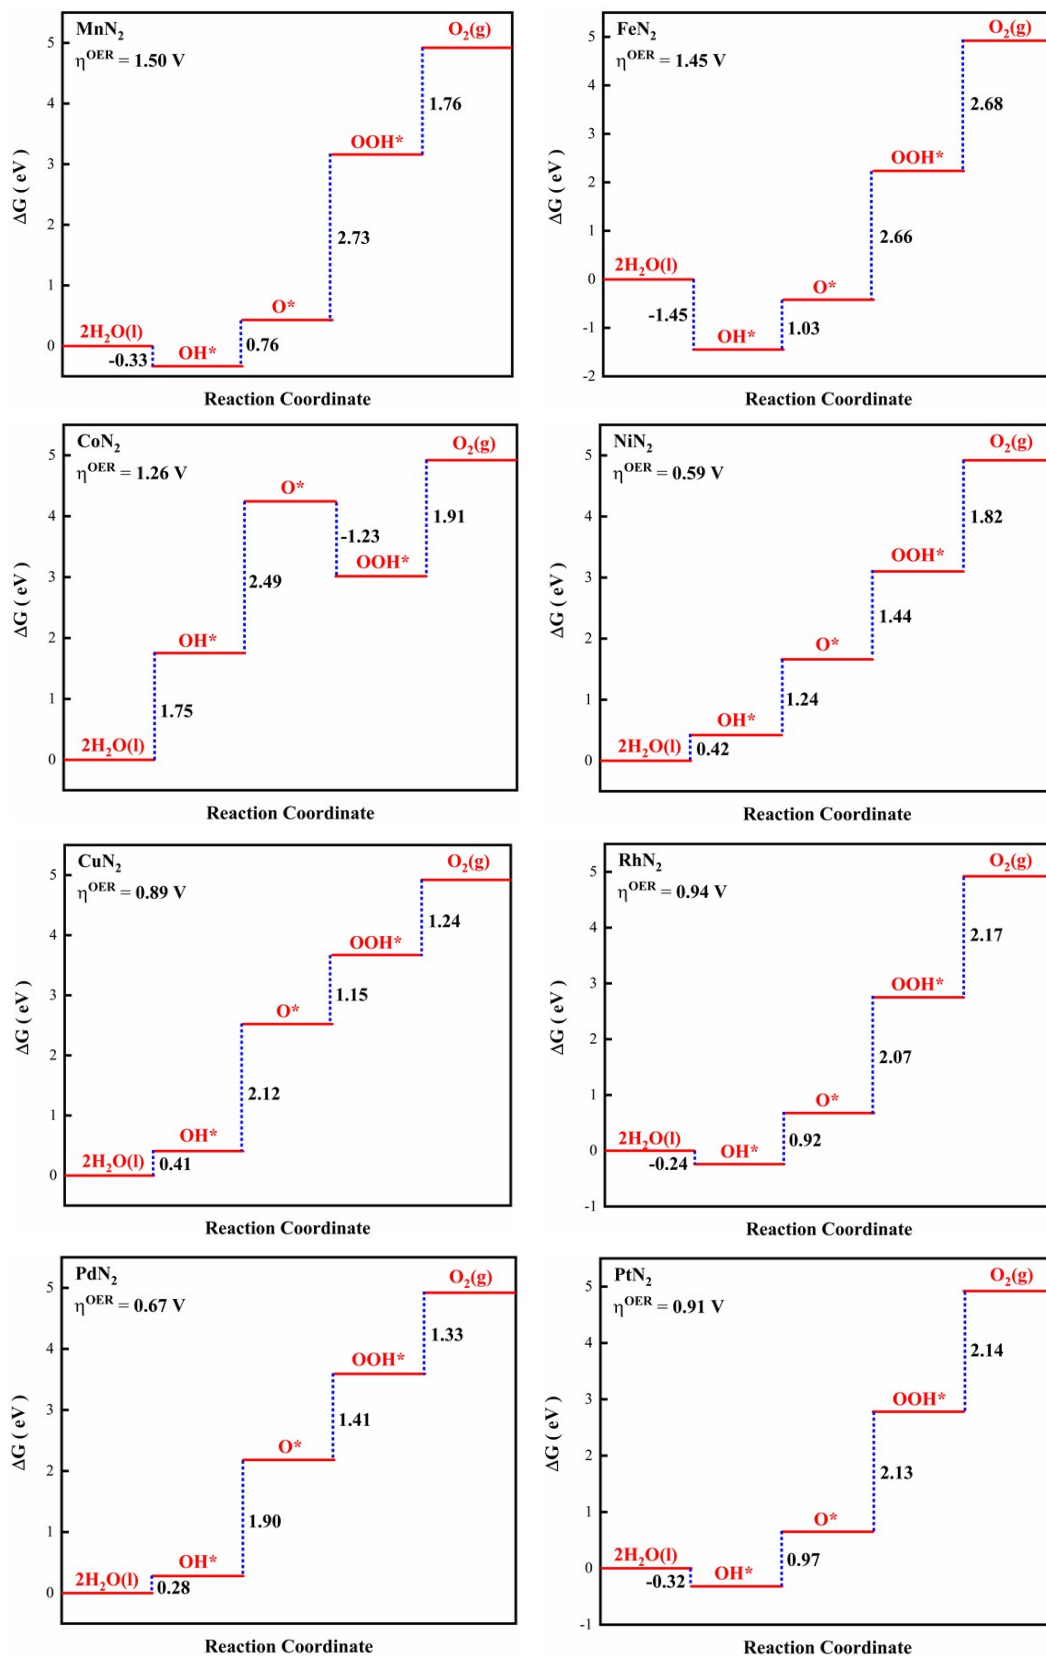

**Fig. S4.** The computed free energy profiles for OER on TMN<sub>1</sub> and TMN<sub>2</sub> moieties embedded into MoS<sub>2</sub> monolayer.

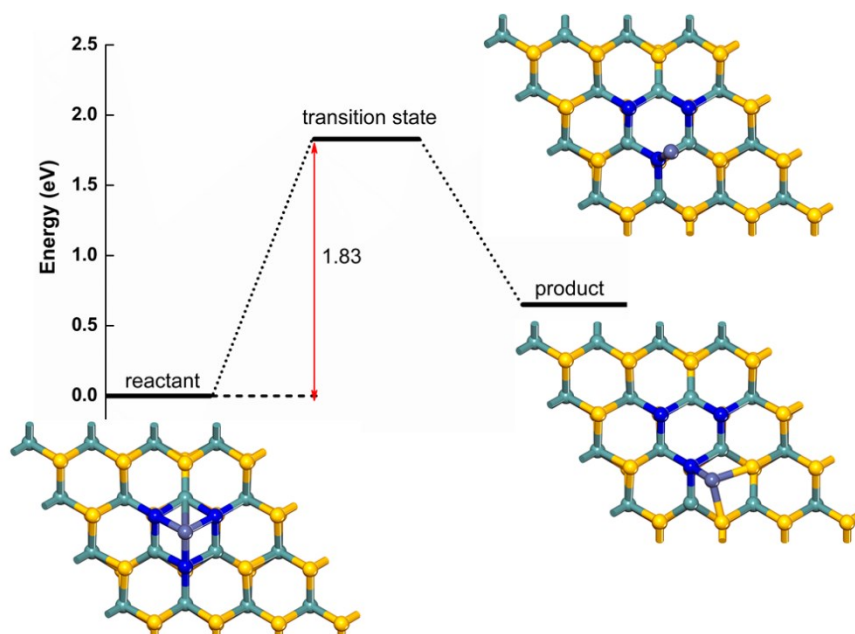

**Fig. S5.** The computed reaction pathway for the diffusion of single Ni atom on NiN<sub>3</sub>@MoS<sub>2</sub>, and the atomic configurations of the involved reactant, transition state, and product.

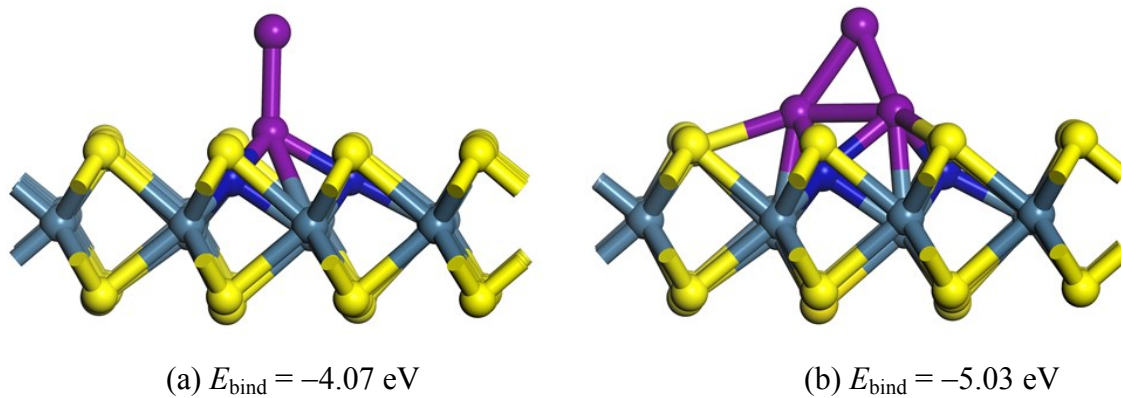

**Fig. S6.** The optimized structures and the corresponding binding energies for (a)  $\text{Ni}_2$  and (c)  $\text{Ni}_3$  clusters anchored on doped  $\text{MoS}_2$  monolayer with three N atoms. Cyan, yellow, purple, and blue balls represent Mo, S, TM, and N atoms, respectively.

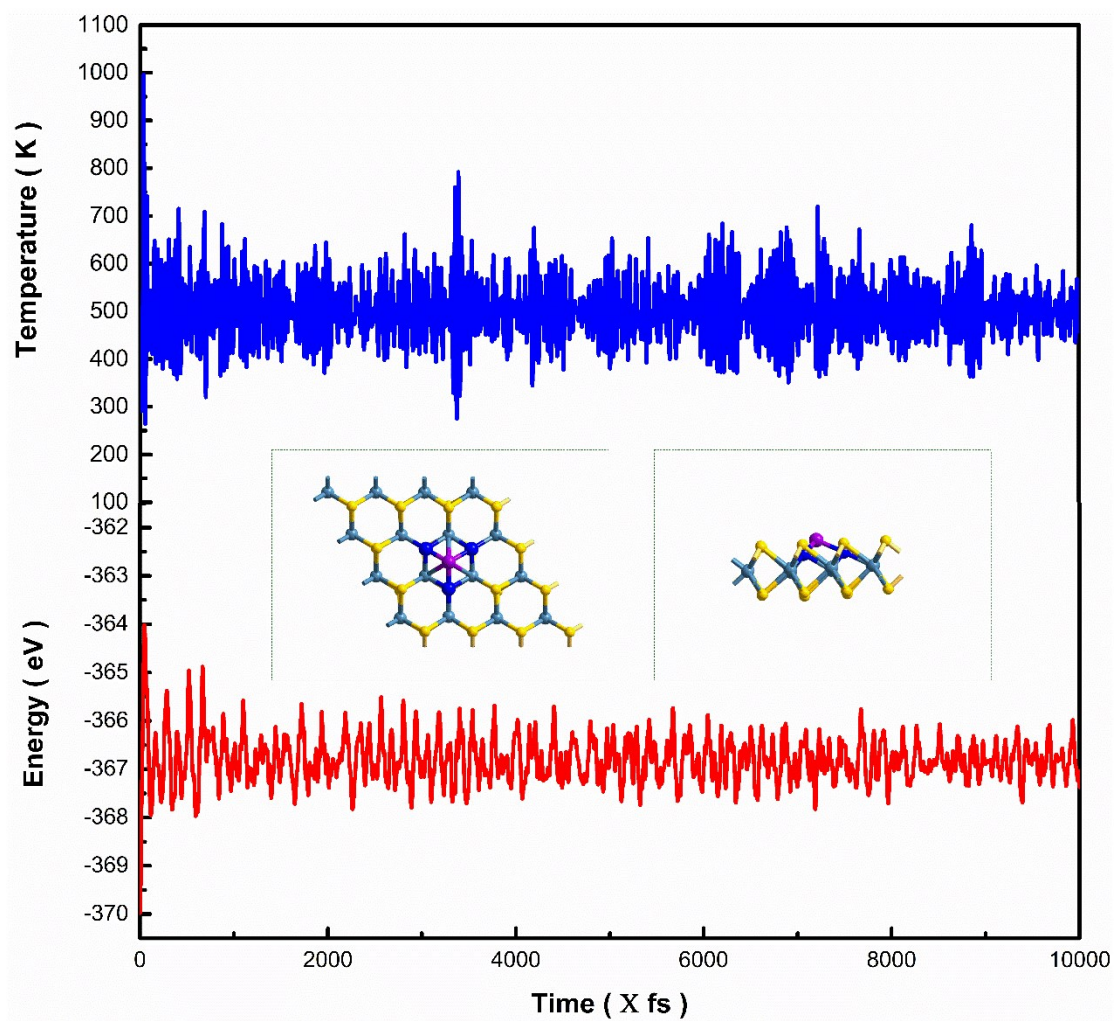

**Fig. S7.** The variations of temperature and energy versus the time for AIMD simulations of NiN<sub>3</sub>@MoS<sub>2</sub>, which is run under 500 K for 10 ps with a time step of 1 fs. Schematic diagrams of the atomic configurations after dynamics simulation (top and side views) are also given.

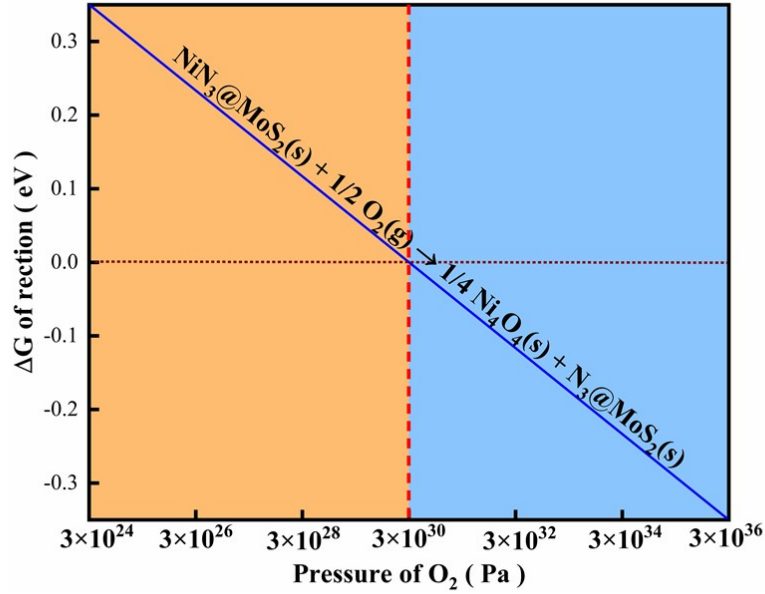

**Fig. S8.** Reaction Gibbs free energy of  $\text{NiN}_3@\text{MoS}_2(s) + 1/2 \text{O}_2(g) \rightarrow \text{N}_3@\text{MoS}_2(s) + 1/4 \text{Ni}_4\text{O}_4(s)$  on  $\text{NiN}_3/\text{MoS}_2$  surface versus  $\text{O}_2$  pressure under 298 K, light yellow and light blue regions represent the formation of Ni SAC and  $\text{Ni}_4\text{O}_4$  oxide, respectively.

The formation of Ni oxide on  $\text{NiN}_3@\text{MoS}_2$  monolayer can be written by:  $\text{NiN}_3@\text{MoS}_2(s) + 1/2 \text{O}_2(g) \rightarrow \text{N}_3@\text{MoS}_2(s) + 1/4 \text{Ni}_4\text{O}_4(s)$ , in which the pressures of the solid states  $\text{NiN}_3@\text{MoS}_2$ ,  $\text{N}_3@\text{MoS}_2$ , and  $\text{Ni}_4\text{O}_4$  were set as zero. Thus, the partial  $\text{O}_2$  pressure for the formation of Ni oxide on  $\text{NiN}_3@\text{MoS}_2$  monolayer can be determined

as follows:<sup>3,4</sup>  $(P_{\text{O}_2})^{\frac{1}{2}} = e^{-\frac{\Delta G}{k_B T}}$ , where  $\Delta G$  is the free energy change for the formation of Ni oxide,  $k_B$  is the Boltzmann constant, and T is the reaction temperature.

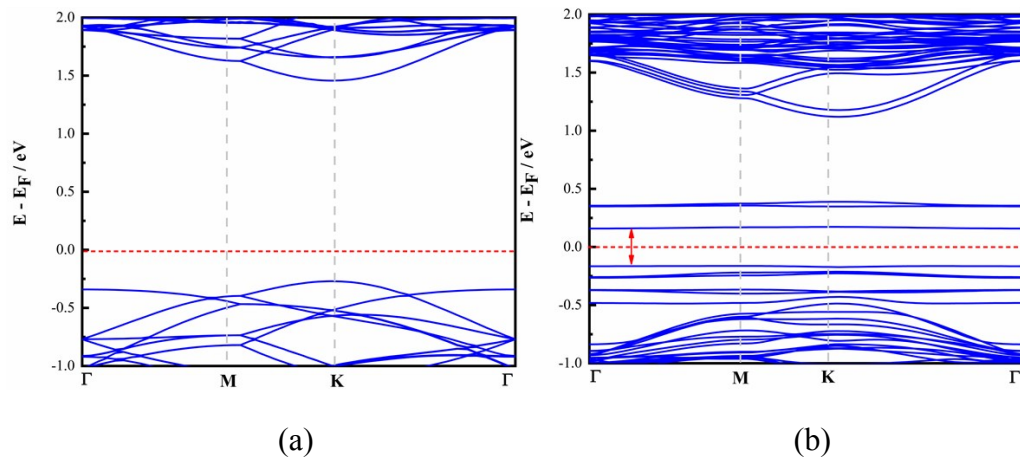

**Fig. S9.** The computed band structures of (a) pristine MoS<sub>2</sub> monolayer and (b) NiN<sub>3</sub>@MoS<sub>2</sub> monolayer. The Fermi level was set to zero in dotted red line.

- 1 Q. Xiong, Y. Wang, P. F. Liu, L. R. Zheng, G. Wang, H. G. Yang, P. K. Wong, H. Zhang and H. Zhao, *Adv. Mater.*, 2018, 30, 1801450.
2. F. He, Y. Liu, Q. Cai and J. Zhao, *New J. Chem.*, 2020, **44**, 16135-16143.
3. X. Xu, H. Xu and D. Cheng, *Nanoscale*, 2019, 11, 20228–20237.
4. J. Bao, Y. Zhou, Y. Zhang, X. Sheng, Y. Wang, S. Liang, C. Guo, W. Yang, T. Zhuang and Y. Hu, *J. Mater. Chem. A*, 2020, **8**, 22181-22190.
5. Y. Wang, W. Sun, X. Ling, X. Shi, L. Li, Y. Deng, C. An and X. Han, *Chem. – A Eur. J.*, 2020, 26, 4097-4103.
6. B. Tang, Z. G. Yu, H. L. Seng, N. Zhang, X. Liu, Y.-W. Zhang, W. Yang and H. Gong, *Nanoscale*, 2018, 10, 20113-20119.
